# Supplementary material for: The Association of PLAUR Genotype and Soluble suPAR Serum Level with COVID-19-Related Lung Damage Severity
Source: MDPI journal article supplement (doi:10.3390/ijms232416210), 2022-12-19
Supplement: s1 [file s1]

## Supplementary Materials

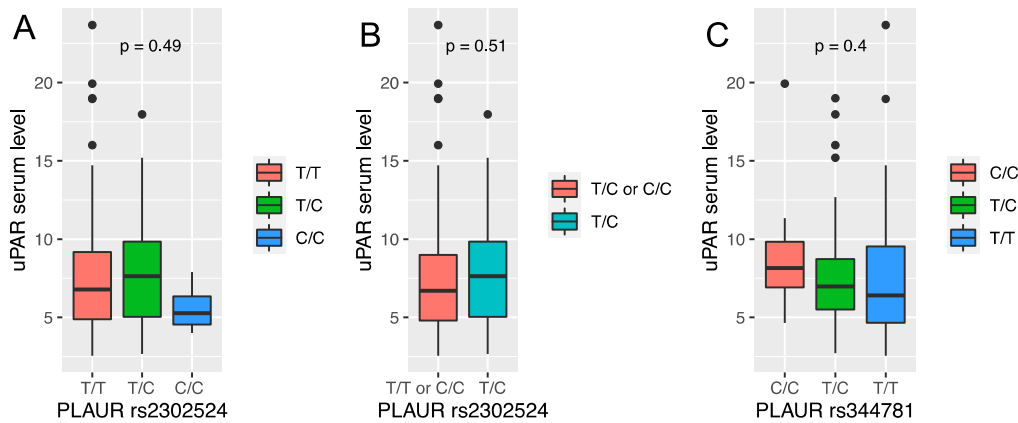

**Figure S1.** *PLAUR* SNP association with uPAR serum levels. **(A)** *PLAUR* rs2302524 association with uPAR serum levels in the codominant model of inheritance (T/T vs. T/C vs. C/C). **(B)** *PLAUR* rs2302524 association with uPAR serum level in the overdominant model of inheritance (T/C vs. T/T-C/C). **(C)** *PLAUR* rs344781 association with uPAR serum levels in the codominant model of inheritance (C/C vs. T/C vs. T/T). Data are presented as boxplots, black dots represent outliers,  $p$ -values as compared by ANOVA are provided.

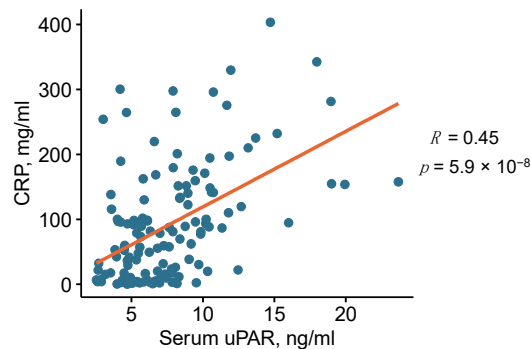

**Figure S2.** Correlation plot for the uPAR and CRP serum levels. The Spearman correlation coefficients ( $R$ ) and the corresponding  $p$ -values ( $p$ ) are shown. The red line represents the linear regression fit, and the grey area represents the 95% confidence intervals. CRP, C-reactive protein.

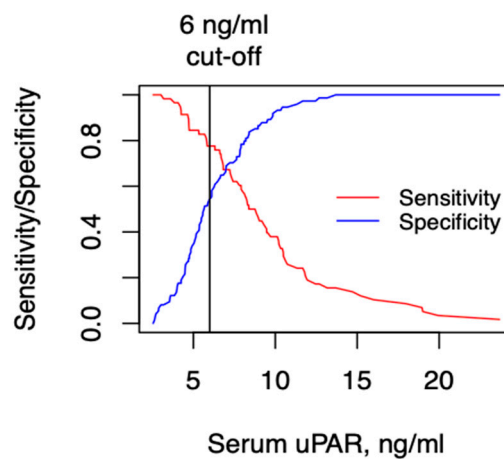

**Figure S3.** Sensitivity and specificity for predicting COVID-19-induced lung damage > 25% at different serum uPAR values. Previously proposed cut-off value of 6 ng/mL is shown.

**Table S1.** *PLAUR* and *NOS3* haplotype frequency estimation and association with lung damage severity ( $\leq 25\%$  or  $> 25\%$ ), adjusted by sex and age. The most prevalent haplotype was set as a reference. OR, odds ratio; CI, confidence intervals.

|   | <i>PLAUR</i> ,<br>rs344781 | <i>PLAUR</i> ,<br>rs2302524 | Haplotype<br>Frequency | OR [95% CI]      | <i>p</i> -value |
|---|----------------------------|-----------------------------|------------------------|------------------|-----------------|
| 1 | T                          | T                           | 0.63679                | 1.00             |                 |
| 2 | C                          | T                           | 0.20427                | 1.31 [0.72–2.36] | 0.3741          |
| 3 | T                          | C                           | 0.09168                | 0.54 [0.21–1.41] | 0.2105          |
| 4 | C                          | C                           | 0.06726                | 0.39 [0.12–1.34] | 0.1362          |
|   | <i>NOS3</i> ,<br>rs2070744 | <i>NOS3</i> ,<br>rs1799983  |                        |                  |                 |
| 1 | T                          | G                           | 0.48564                | 1.00             |                 |
| 2 | C                          | G                           | 0.20641                | 1.37 [0.69–2.72] | 0.3679          |
| 3 | C                          | T                           | 0.19425                | 1.19 [0.62–2.26] | 0.6041          |
| 4 | T                          | T                           | 0.11369                | 2.56 [0.99–6.65] | 0.0527          |

**Table S2.** Age- and sex-adjusted genotype association with uPAR serum levels with the assumption of a codominant model of inheritance. CI, confidence intervals; del, deletion; ins, insertion.

| SNP                            | Genotype | uPAR Serum Level, Mean $\pm$ SEM | Mean Difference [95% CI] | <i>p</i> -value |
|--------------------------------|----------|----------------------------------|--------------------------|-----------------|
| <i>ACE</i> , rs4646994         | insins   | 7.73 $\pm$ 0.77                  | 0                        |                 |
|                                | insdel   | 7.82 $\pm$ 0.42                  | 0.63 [–0.89–2.15]        | 0.72            |
|                                | deldel   | 7.09 $\pm$ 0.53                  | 0.38 [–1.51–2.27]        |                 |
| <i>NOS3</i> ,<br>rs2070744     | TT       | 7.57 $\pm$ 0.5                   | 0                        |                 |
|                                | CT       | 7.26 $\pm$ 0.45                  | –0.31 [–1.70–1.08]       | 0.28            |
|                                | CC       | 8.72 $\pm$ 1.06                  | 1.18 [–0.71–3.08]        |                 |
| <i>NOS3</i> ,<br>rs1799983     | GG       | 7.27 $\pm$ 0.49                  | 0                        |                 |
|                                | GT       | 7.99 $\pm$ 0.5                   | 0.50 [–0.85–1.85]        | 0.77            |
|                                | TT       | 7.6 $\pm$ 0.94                   | 0.15 [–2.25–2.55]        |                 |
| <i>SERPINE1</i> ,<br>rs1799768 | 4G4G     | 7.94 $\pm$ 0.68                  | 0                        |                 |
|                                | 4G5G     | 7.68 $\pm$ 0.49                  | –0.44 [–2.00–1.11]       | 0.64            |
|                                | 5G5G     | 7.13 $\pm$ 0.57                  | –0.85 [–2.61–0.92]       |                 |
| <i>PLAU</i> ,<br>rs2227564     | CC       | 7.33 $\pm$ 0.39                  | 0                        |                 |
|                                | CT       | 8.2 $\pm$ 0.63                   | 0.95 [–0.39–2.29]        | 0.29            |
|                                | TT       | 6.5 $\pm$ 0.89                   | –1.07 [–4.80–2.66]       |                 |
| <i>PLAUR</i> ,<br>rs344781     | TT       | 7.38 $\pm$ 0.45                  | 0                        |                 |
|                                | TC       | 7.64 $\pm$ 0.5                   | 0.33 [–1.02–1.67]        | 0.42            |
|                                | CC       | 9.1 $\pm$ 1.36                   | 1.65 [–0.83–4.13]        |                 |
| <i>PLAUR</i> ,<br>rs2302524    | TT       | 7.56 $\pm$ 0.39                  | 0                        |                 |
|                                | TC       | 7.98 $\pm$ 0.64                  | 0.30 [–1.18–1.78]        | 0.44            |
|                                | CC       | 5.61 $\pm$ 0.85                  | –2.26 [–6.01–1.48]       |                 |
